# Supplementary material for: A new metallic π-conjugated carbon sheet used for the cathode of Li–S batteries
Source: Royal Society of Chemistry journal article supplement (doi:10.1039/c8ra07074a), 2018-12-21
Supplement: c8ra07074a1.pdf [file c8ra07074a1.pdf]

**Supplementary information for the manuscript**

**“A new metallic  $\pi$ -conjugated carbon sheet used for the  
cathode of Li-S batteries.”**

Yingxiang Cai <sup>\*a</sup>, Li Zeng<sup>a</sup>, Zhihao Xiang, Yu Zhang<sup>a</sup> and Xuechun Xu<sup>a</sup>

<sup>a</sup> Department of Physics, NanChang University, Jiangxi, Nanchang 330031, P.R. China.

E-mail: [yingxiangcai@ncu.edu.cn](mailto:yingxiangcai@ncu.edu.cn)

## 1. NVT molecular dynamics simulation at 300K.

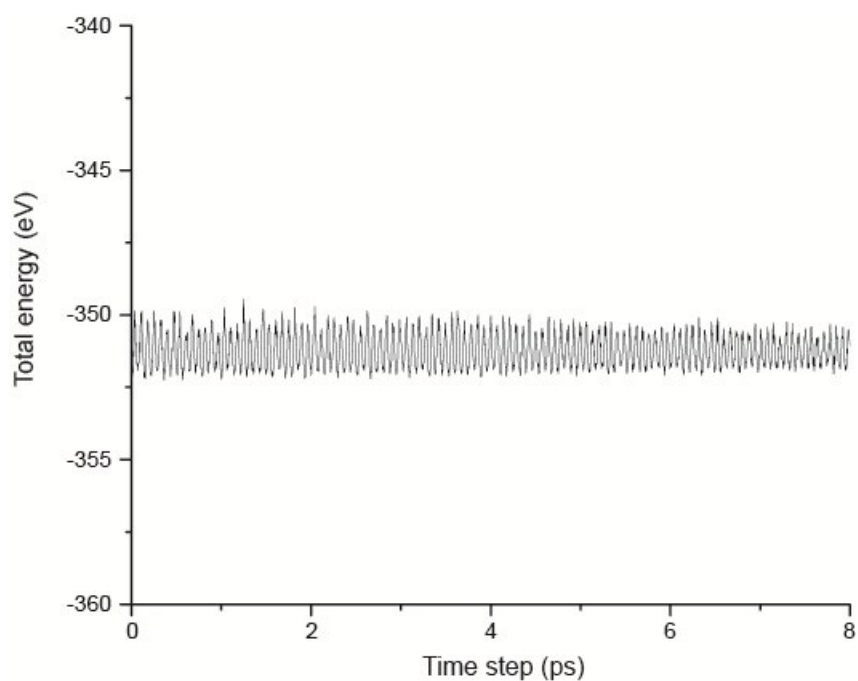

Fig. S1. Total energy change with time step within 8ps for PHE-graphene.

## 2. The adsorption geometries and energies of $\text{Li}_2\text{S}_n$ and $\text{S}_8$ on PHE-graphene.

Table. S1. The adsorption energies of  $\text{Li}_2\text{S}_n$  and  $\text{S}_8$  clusters on PHE-graphene.

| Clusters               | $\text{Li}_2\text{S}$ | $\text{Li}_2\text{S}_2$ | $\text{Li}_2\text{S}_3$ | $\text{Li}_2\text{S}_4$ | $\text{Li}_2\text{S}_5$ | $\text{Li}_2\text{S}_6$ | $\text{Li}_2\text{S}_7$ | $\text{Li}_2\text{S}_8$ | $\text{S}_8$ |
|------------------------|-----------------------|-------------------------|-------------------------|-------------------------|-------------------------|-------------------------|-------------------------|-------------------------|--------------|
| Adsorption energy (eV) | 1.029                 | 0.611                   | 0.676                   | 0.357                   | 0.199                   | 0.245                   | 0.249                   | 0.231                   | 0.037        |

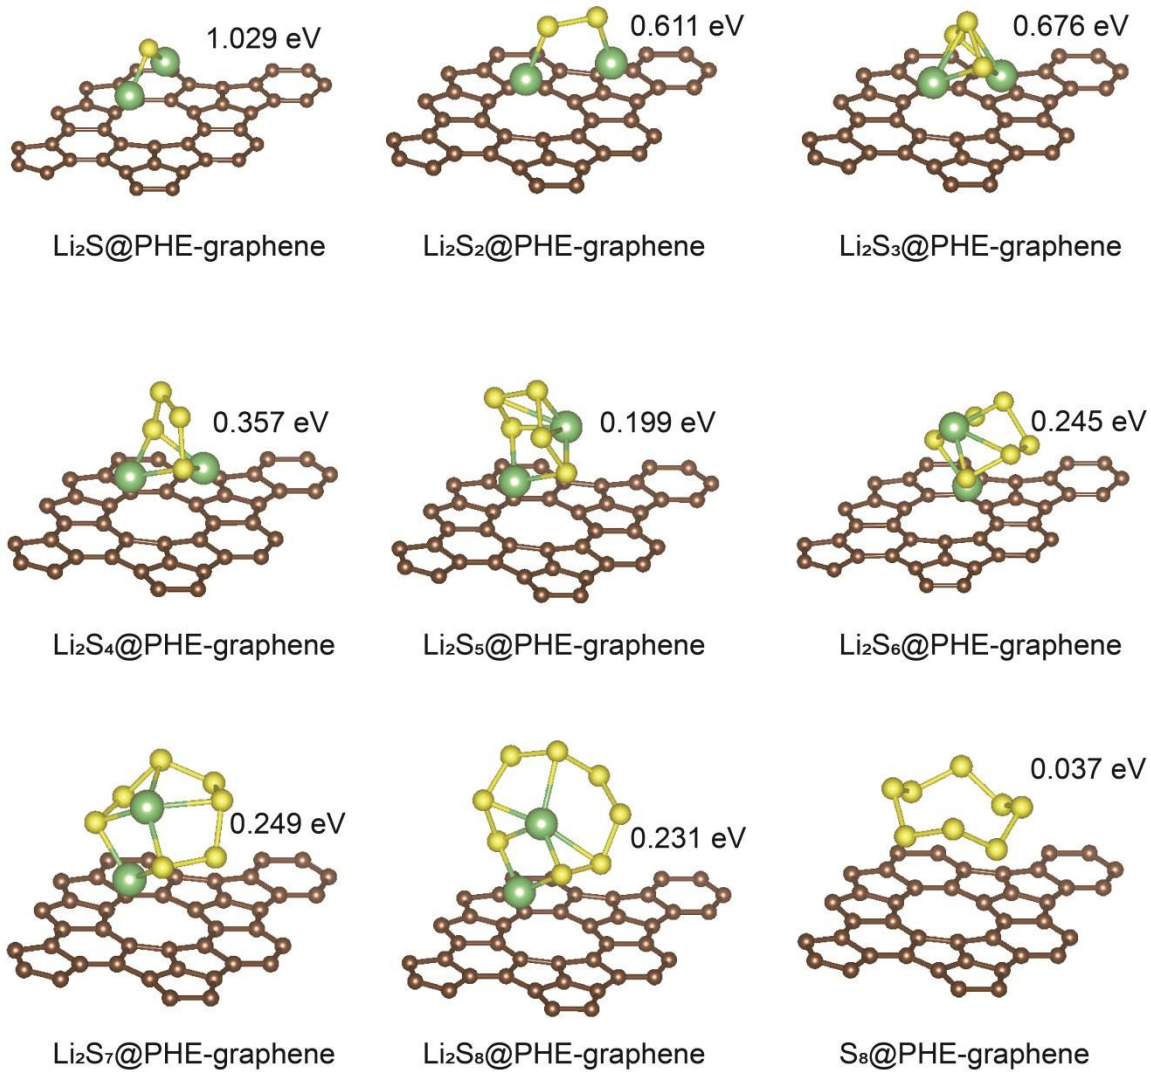

Fig. S2. The adsorption geometries of  $\text{Li}_2\text{S}_n$  and  $\text{S}_8$  clusters on PHE-graphene.

**3. The POSCAR files of optimized unit-cells for PHE-graphene and other two-dimensional carbon allotropes including hexagonal heackelite, oblique heackelite, rectangular heackelite, pza-C10, biphenylene, pentahexoctite, pentaheptite, OPG-L, phagraphene, planar T-graphene, HOP graphene, THD-graphene, DHP-graphene, graphene, graphdiyne,  $\alpha$ -graphyne,  $\beta$ -graphyne,  $\gamma$ -graphyne and 6,6,12-graphyne.**

**No.1** PHE-graphene

1.000000

2.869056 4.969350 0.000000

-5.738112 0.000001 0.000000

0.000000 0.000000 15.00619

C

10

Direct

0.666667 0.333333 0.500000

0.326256 0.409832 0.500000

0.590167 0.916422 0.500000

0.083577 0.673744 0.500000

0.083578 0.409832 0.500000

0.590169 0.673745 0.500000

0.326255 0.916422 0.500000

0.387856 0.193927 0.500000

0.806072 0.193927 0.500000

0.806073 0.612145 0.500000

**No.2** Hexagonal heackelite

1.000000

|           |           |           |
|-----------|-----------|-----------|
| 7.092510  | -0.000103 | 0.000000  |
| -3.546346 | 6.142241  | 0.000000  |
| 0.000000  | 0.000000  | 14.968335 |

C

16

Direct

|           |           |          |
|-----------|-----------|----------|
| 0.434153  | 0.248309  | 0.500000 |
| 0.751686  | 0.185842  | 0.500000 |
| 0.814159  | 0.565848  | 0.500000 |
| 0.565846  | 0.814157  | 0.500000 |
| 0.185841  | 0.751685  | 0.500000 |
| 0.248310  | 0.434154  | 0.500000 |
| 0.789914  | -0.000008 | 0.500000 |
| -0.000008 | 0.789914  | 0.500000 |
| 0.210069  | 0.210069  | 0.500000 |
| 0.589585  | 0.476927  | 0.500000 |
| 0.523081  | 0.112668  | 0.500000 |
| 0.887349  | 0.410422  | 0.500000 |
| 0.410421  | 0.887348  | 0.500000 |
| 0.112667  | 0.523080  | 0.500000 |

0.476927 0.589585 0.500000

0.000000 0.000000 0.500000

**No.3** Oblique heackelite

1.000000

6.096465 0.0144806 0.000000

1.228688 5.3890705 0.000000

0.000000 0.0000000 14.961644

C

12

Direct

0.643691 0.438966 0.500000

0.645281 0.679694 0.500000

0.086875 0.696455 0.500000

0.202096 0.422205 0.500000

0.203185 0.915211 0.500000

0.085786 0.203449 0.500000

0.440219 0.879872 0.500000

0.848753 0.238788 0.500000

0.850048 0.777556 0.500000

0.438924 0.341104 0.500000

0.762351 0.030106 0.500000

0.526620 0.088554 0.500000

**No.4** Rectangular heackelite

1.000000

4.748935 -0.178167 0.000000

1.304090 4.569844 0.000000

0.000000 0.000000 14.964649

C

8

Direct

0.116653 0.565888 0.500000

0.883347 0.434112 0.500000

0.434112 0.883347 0.500000

0.565888 0.116653 0.500000

0.879441 0.120559 0.500000

0.120559 0.879441 0.500000

0.407002 0.407002 0.500000

0.592998 0.592998 0.500000

**No.5 Pza-C<sub>10</sub>**

1.000000

5.993472 0.636234 0.000000

0.504692 4.600517 0.000000

0.000000 0.000000 14.952497

C

10

Direct

0.261657 0.259272 0.500000

0.632072 0.336987 0.500000

0.863105 0.367252 0.500000

0.852479 0.686130 0.500000

0.482065 0.608425 0.500000

0.251028 0.578153 0.500000

0.062593 0.135914 0.500000

0.051541 0.809491 0.500000

0.505551 0.119420 0.500000

0.608596 0.825985 0.500000



**No.6** Biphenylene

1.000000

4.528746 0.000000 0.000000

0.000000 3.760073 0.000000

0.000000 0.000000 14.991926

C

6

Direct

0.660568 0.000000 0.500000

0.161119 0.306387 0.500000

0.339432 0.000000 0.500000

0.838881 0.306387 0.500000

0.161119 0.693613 0.500000

0.838881 0.693613 0.500000

**No.7** Pentahexoctite

1.000000

5.780754 0.155517 0.000000

-0.103028 3.831546 0.000000

0.000000 0.000000 14.962354

C

8

Direct

0.747477 0.595497 0.500000

0.203707 0.223643 0.500000

0.356056 0.909565 0.500000

0.595128 0.909576 0.500000

0.975591 0.091107 0.500000

0.975593 0.728033 0.500000

0.747474 0.223655 0.500000

0.203710 0.595486 0.500000

**No.8** Pentaheptite

1.000000

4.718015 0.569199 0.000000

0.570808 4.717825 0.000000

0.000000 0.000000 14.956813

C

8

Direct

|          |          |          |
|----------|----------|----------|
| 0.554239 | 0.440541 | 0.500000 |
| 0.787545 | 0.572318 | 0.500000 |
| 0.236773 | 0.123091 | 0.500000 |
| 0.550325 | 0.126993 | 0.500000 |
| 0.791448 | 0.885870 | 0.500000 |
| 0.263892 | 0.599436 | 0.500000 |
| 0.104997 | 0.889783 | 0.500000 |
| 0.077893 | 0.413439 | 0.500000 |

**No.9 OPG-L**

|          |          |           |
|----------|----------|-----------|
| 1.000000 |          |           |
| 4.909786 | 0.045627 | 0.000000  |
| 2.097072 | 6.863017 | 0.000000  |
| 0.000000 | 0.000000 | 14.972698 |

C

12

Direct

|          |          |          |
|----------|----------|----------|
| 0.914991 | 0.931806 | 0.500000 |
| 0.085009 | 0.068194 | 0.500000 |
| 0.585008 | 0.568194 | 0.500000 |

|          |          |          |
|----------|----------|----------|
| 0.414992 | 0.431806 | 0.500000 |
| 0.605802 | 0.241715 | 0.500000 |
| 0.394198 | 0.758285 | 0.500000 |
| 0.894198 | 0.258285 | 0.500000 |
| 0.105802 | 0.741715 | 0.500000 |
| 0.384258 | 0.961413 | 0.500000 |
| 0.615742 | 0.038587 | 0.500000 |
| 0.884258 | 0.461413 | 0.500000 |
| 0.115742 | 0.538587 | 0.500000 |

**No.10** Phagraphene

1.000000

|          |           |          |
|----------|-----------|----------|
| 8.116902 | -0.000000 | 0.000000 |
|----------|-----------|----------|

|           |          |          |
|-----------|----------|----------|
| -0.000000 | 6.643094 | 0.000000 |
|-----------|----------|----------|

|          |          |           |
|----------|----------|-----------|
| 0.000000 | 0.000000 | 14.978273 |
|----------|----------|-----------|

C

20

Direct

|          |          |          |
|----------|----------|----------|
| 0.923852 | 0.934608 | 0.500000 |
|----------|----------|----------|

|          |          |          |
|----------|----------|----------|
| 0.076148 | 0.065392 | 0.500000 |
|----------|----------|----------|

|          |          |          |
|----------|----------|----------|
| 0.576148 | 0.934608 | 0.500000 |
| 0.423852 | 0.065392 | 0.500000 |
| 0.250000 | 0.979506 | 0.500000 |
| 0.750000 | 0.020494 | 0.500000 |
| 0.389038 | 0.645688 | 0.500000 |
| 0.610962 | 0.354312 | 0.500000 |
| 0.110962 | 0.645688 | 0.500000 |
| 0.889038 | 0.354312 | 0.500000 |
| 0.163277 | 0.440168 | 0.500000 |
| 0.836723 | 0.559832 | 0.500000 |
| 0.336723 | 0.440168 | 0.500000 |
| 0.663277 | 0.559832 | 0.500000 |
| 0.250000 | 0.770918 | 0.500000 |
| 0.750000 | 0.229082 | 0.500000 |
| 0.950547 | 0.719960 | 0.500000 |
| 0.049453 | 0.280040 | 0.500000 |
| 0.549453 | 0.719960 | 0.500000 |
| 0.450547 | 0.280040 | 0.500000 |

**No.11** Planar T-graphene

1.000000

4.877148 -0.000000 0.000000

0.000000 4.877696 0.000000

0.000000 0.000000 14.987877

C

8

Direct

0.150553 0.349471 0.500000

0.849447 0.650529 0.500000

0.349447 0.849471 0.500000

0.650553 0.150529 0.500000

0.150534 0.650546 0.500000

0.849466 0.349454 0.500000

0.349466 0.150546 0.500000

0.650534 0.849454 0.500000

**No.12** HOP graphene

1.000000

5.491138 -2.644441 0.000000

3.760779 3.183190 0.000000

0.000000 0.000000 14.964989

C

10

Direct

0.645551 0.177631 0.500000

0.354449 0.822369 0.500000

-0.000592 0.647812 0.500000

0.000592 0.352188 0.500000

0.243076 0.618464 0.500000

0.756924 0.381536 0.500000

0.758249 0.860893 0.500000

0.241751 0.139107 0.500000

0.390563 0.305581 0.500000

0.609437 0.694419 0.500000

**No.13** THD-graphene

1.000000

5.864007 -3.385586 -0.000000

-0.000000 6.771172 0.000000

0.000000 -0.000000 14.998930

C

12

Direct

0.792929 0.787746 0.500000

0.994816 0.787745 0.500000

0.212255 0.005184 0.500000

0.212254 0.207071 0.500000

0.994816 0.207073 0.500000

0.792928 0.005185 0.500000

0.540404 0.878921 0.500000

0.540406 0.661482 0.500000

0.121078 0.661483 0.500000

0.338517 0.878922 0.500000

0.338518 0.459594 0.500000

0.121079 0.459596 0.500000

**No.14** DHP-graphene

1.000000

7.063079 0.000000 0.000000

-0.000000 9.959695 0.000000



0.000000 0.000000 14.996807

C

24

Direct

0.692328 0.312887 0.500000

0.307672 0.687113 0.500000

0.307672 0.312887 0.500000

0.692328 0.687113 0.500000

0.192328 0.812887 0.500000

0.807672 0.187113 0.500000

0.807672 0.812887 0.500000

0.192328 0.187113 0.500000

0.317710 0.071568 0.500000

0.682290 0.928432 0.500000

0.682290 0.071568 0.500000

0.317710 0.928432 0.500000

0.817710 0.571568 0.500000

0.182290 0.428432 0.500000

0.182290 0.571568 0.500000

0.817710 0.428432 0.500000

|          |          |          |
|----------|----------|----------|
| 0.500000 | 0.128523 | 0.500000 |
| 0.500000 | 0.871477 | 0.500000 |
| 0.000000 | 0.628523 | 0.500000 |
| 0.000000 | 0.371477 | 0.500000 |
| 0.500000 | 0.275954 | 0.500000 |
| 0.500000 | 0.724046 | 0.500000 |
| 0.000000 | 0.775954 | 0.500000 |
| 0.000000 | 0.224046 | 0.500000 |

**No.15** Graphene

|           |           |           |
|-----------|-----------|-----------|
| 1.000000  |           |           |
| 2.138312  | -1.234555 | -0.000000 |
| -0.000000 | 2.469110  | -0.000000 |
| -0.000000 | -0.000000 | 14.993051 |

C

2

Direct

|          |          |          |
|----------|----------|----------|
| 0.000000 | 0.100000 | 0.500000 |
| 0.666667 | 0.333333 | 0.500000 |

**No.16** Graphdiyne

1.000000

8.201007 -4.734854 0.000000

-0.000000 9.469707 -0.000000

0.000000 -0.000000 14.998852

C

18

Direct

0.151136 0.100000 0.500000

0.299073 0.000000 0.500000

0.429120 0.000000 0.500000

0.570880 0.100000 0.500000

0.700927 0.100000 0.500000

0.848864 0.000000 0.500000

0.000000 0.151136 0.500000

0.151136 0.151136 0.500000

0.100000 0.299073 0.500000

0.299073 0.299073 0.500000

0.100000 0.429120 0.500000

0.429120 0.429120 0.500000

|          |          |          |
|----------|----------|----------|
| 0.000000 | 0.570880 | 0.500000 |
| 0.570880 | 0.570880 | 0.500000 |
| 0.000000 | 0.700927 | 0.500000 |
| 0.700927 | 0.700927 | 0.500000 |
| 0.100000 | 0.848864 | 0.500000 |
| 0.848864 | 0.848864 | 0.500000 |

**No.17**  $\alpha$ -graphyne

|           |           |           |
|-----------|-----------|-----------|
| 1.000000  |           |           |
| -3.483779 | 6.035372  | 0.000000  |
| -6.968674 | -0.000644 | 0.000000  |
| 0.000000  | 0.000000  | 14.986003 |

C

8

Direct

|          |          |          |
|----------|----------|----------|
| 0.666684 | 0.666684 | 0.500000 |
| 0.333316 | 0.333316 | 0.500000 |
| 0.449023 | 0.449022 | 0.500000 |
| 0.550983 | 0.898063 | 0.500000 |
| 0.101937 | 0.449017 | 0.500000 |

0.550977 0.550978 0.500000

0.449017 0.101937 0.500000

0.898063 0.550983 0.500000

**No.18**  $\beta$ -graphyne

1.000000

4.743340 8.215704 -0.000000

-4.743340 8.215704 -0.000000

-0.000000 0.000000 14.975595

C

18

Direct

0.724160 0.854518 0.500000

0.145482 0.578676 0.500000

0.421324 0.724160 0.500000

0.275840 0.145482 0.500000

0.854518 0.421324 0.500000

0.578676 0.275840 0.500000

0.854518 0.724160 0.500000

0.275840 0.578676 0.500000

|           |           |          |
|-----------|-----------|----------|
| 0.421324  | 0.854518  | 0.500000 |
| 0.145482  | 0.275840  | 0.500000 |
| 0.724160  | 0.421324  | 0.500000 |
| 0.578676  | 0.145482  | 0.500000 |
| 0.421641  | 0.578359  | 0.500000 |
| 0.421641  | -0.000000 | 0.500000 |
| -0.000000 | 0.421641  | 0.500000 |
| 0.578359  | 0.421641  | 0.500000 |
| 0.578359  | 0.000000  | 0.500000 |
| 0.000000  | 0.578359  | 0.500000 |

**No.19**  $\gamma$ -graphyne

|           |          |           |
|-----------|----------|-----------|
| 1.000000  |          |           |
| 3.446800  | 5.970034 | 0.000000  |
| -6.893611 | 0.000006 | 0.000000  |
| 0.000000  | 0.000000 | 14.958788 |

C

12

Direct

|          |          |          |
|----------|----------|----------|
| 0.793230 | 0.000003 | 0.500000 |
|----------|----------|----------|

|          |          |          |
|----------|----------|----------|
| 0.000002 | 0.793229 | 0.500000 |
| 0.206776 | 0.206777 | 0.500000 |
| 0.793226 | 0.793229 | 0.500000 |
| 0.206773 | 0.000003 | 0.500000 |
| 0.000001 | 0.206777 | 0.500000 |
| 0.411338 | 0.000003 | 0.500000 |
| 0.999998 | 0.411336 | 0.500000 |
| 0.588665 | 0.588669 | 0.500000 |
| 0.411338 | 0.411336 | 0.500000 |
| 0.588665 | 0.000003 | 0.500000 |
| 0.000005 | 0.588669 | 0.500000 |

**No.20** 6,6,12-graphyne

|          |          |           |
|----------|----------|-----------|
| 1.000000 |          |           |
| 9.433827 | 0.000000 | 0.000000  |
| 0.000000 | 6.906897 | 0.000000  |
| 0.000000 | 0.000000 | 14.954921 |

C

18

Direct

|          |          |          |
|----------|----------|----------|
| 0.868739 | 0.895467 | 0.500000 |
| 0.131261 | 0.104533 | 0.500000 |
| 0.131261 | 0.895467 | 0.500000 |
| 0.868739 | 0.104533 | 0.500000 |
| 0.259084 | 0.205291 | 0.500000 |
| 0.740916 | 0.794709 | 0.500000 |
| 0.740916 | 0.205291 | 0.500000 |
| 0.259084 | 0.794709 | 0.500000 |
| 0.500000 | 0.605123 | 0.500000 |
| 0.500000 | 0.394877 | 0.500000 |
| 0.627533 | 0.293373 | 0.500000 |
| 0.372467 | 0.706627 | 0.500000 |
| 0.372467 | 0.293373 | 0.500000 |
| 0.627533 | 0.706627 | 0.500000 |
| 0.000000 | 0.207823 | 0.500000 |
| 0.000000 | 0.792177 | 0.500000 |
| 0.000000 | 0.411286 | 0.500000 |
| 0.000000 | 0.588714 | 0.500000 |
